# Supplementary material for: Inﬂuence of Various Criteria on Identifying the Springtime Tropospheric Ozone Depletion Events (ODEs) at Utqiagvik, Arctic
Source: Copernicus journal article supplement (doi:10.5194/egusphere-2024-3873), 2025-05-14
Supplement: Supplementary file 1 [file egusphere-2024-3873-supplement.pdf]

# **Influence of Various Criteria on Identifying the Springtime Tropospheric Ozone Depletion Events (ODEs) at Utqiagvik, Arctic: Supplementary Information**

Xiaochun Zhu<sup>1</sup>, Le Cao<sup>1</sup>, Xin Yang<sup>2</sup>, Simeng Li<sup>3</sup>, Jiandong Wang<sup>1</sup>, and Tianliang Zhao<sup>1</sup>

<sup>1</sup>China Meteorological Administration Aerosol-Cloud and Precipitation Key Laboratory, Nanjing University of Information Science and Technology, Nanjing, 210044, China

<sup>2</sup>British Antarctic Survey, Natural Environment Research Council, Cambridge, UK

<sup>3</sup>Institute of Environmental Sciences, Universiteit Leiden, Leiden, 2333 CA, the Netherlands

**Correspondence:** L. Cao  
(le.cao@nuist.edu.cn)

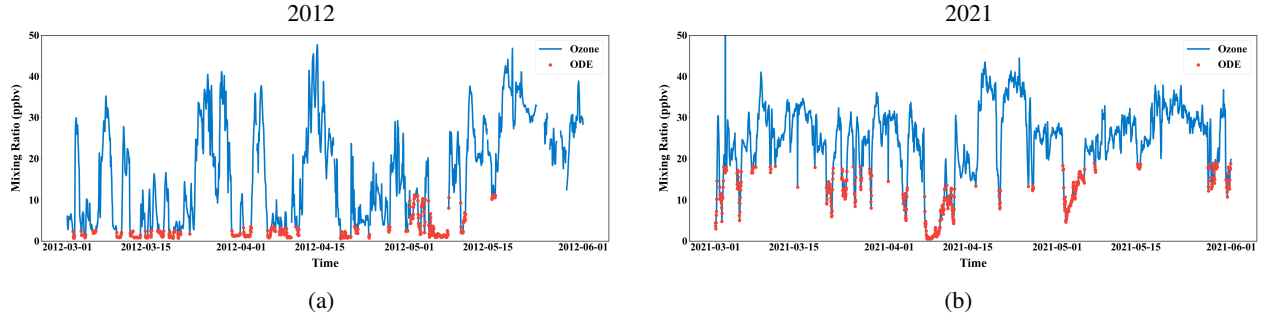

**Figure S1.** Screened results for the years 2012 and 2021 using the modified VM criteria, in which  $\alpha$  in the equation  $([O_3]_i - \overline{[O_3]}) < \alpha \cdot \sigma$  is set to -0.8. The blue curve represents the hourly time series of the ozone mixing ratio, and the red dots denote the ODE hours identified by the criterion.

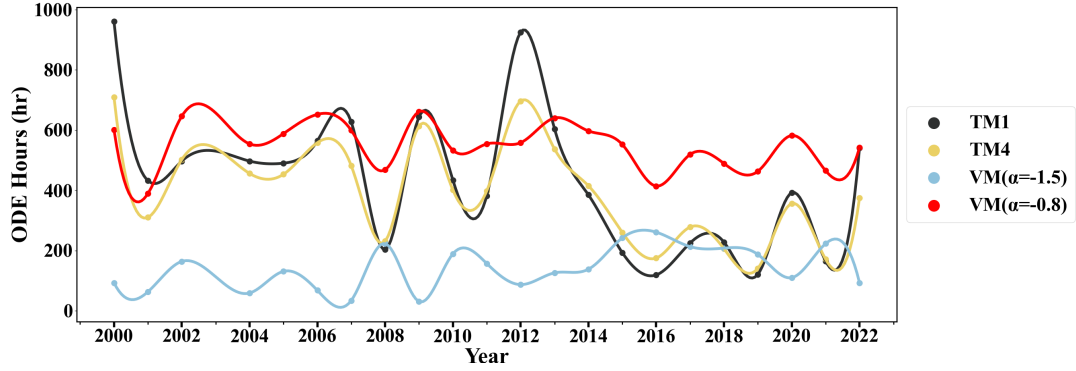

**Figure S2.** Number of ODE hours identified by each criterion from 2000 to 2022. VM( $\alpha = -1.5$ ) denotes that  $\alpha$  in the equation  $([O_3]_i - \overline{[O_3]}) < \alpha \cdot \sigma$  is set to -1.5, and VM( $\alpha = -0.8$ ) denotes that  $\alpha$  is set to -0.8.

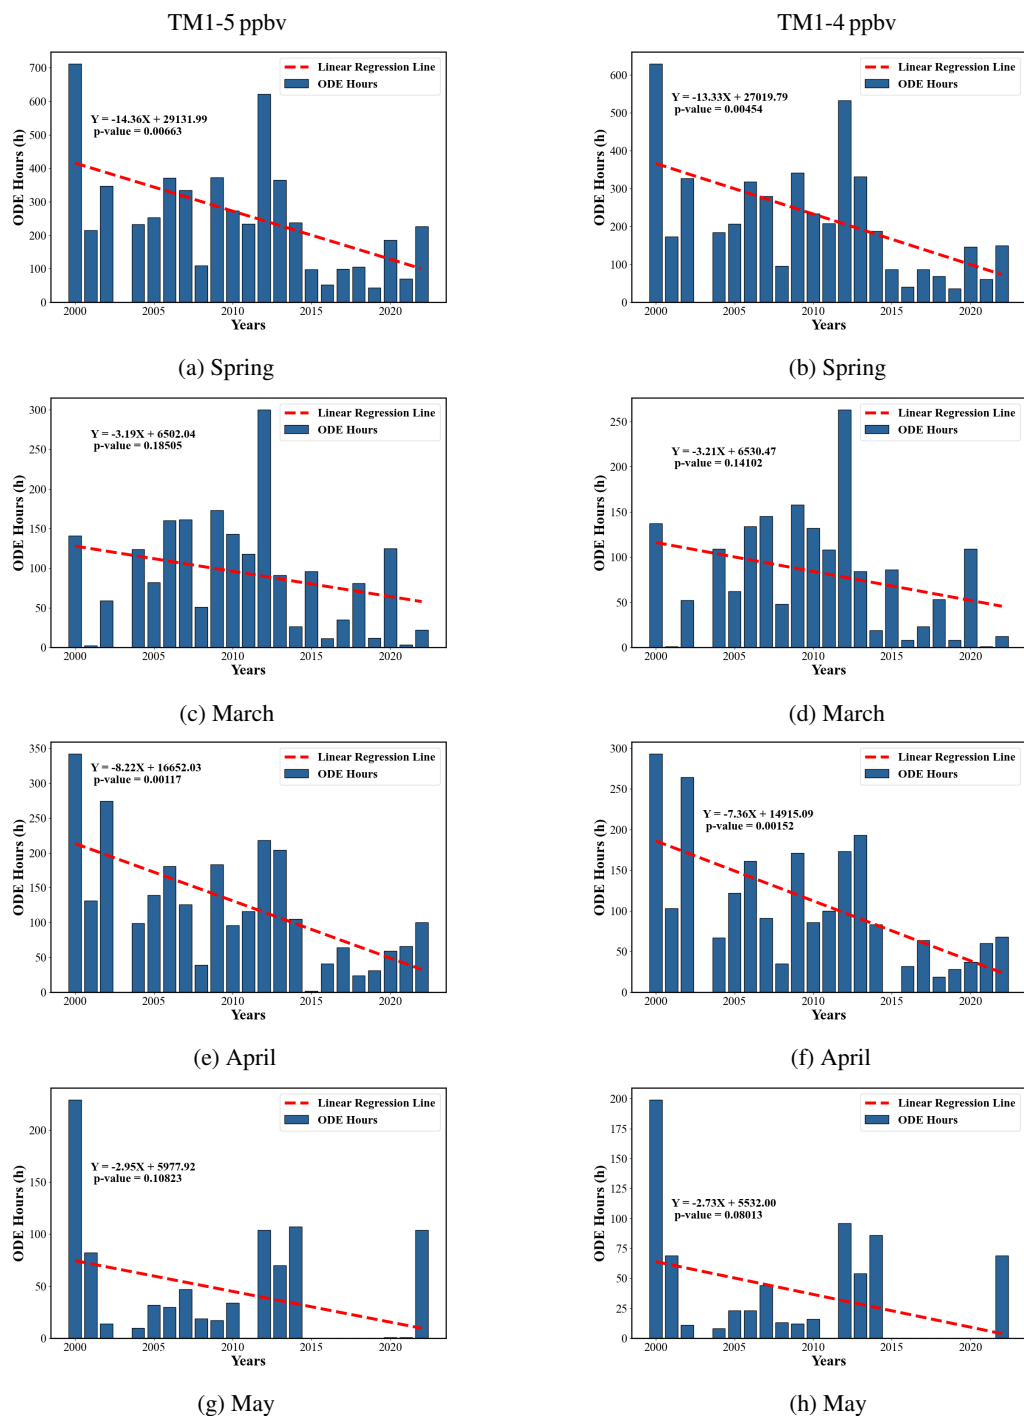

**Figure S3.** Yearly variability of the ODE hours at the BRW station, identified by two criteria with different constant thresholds (5 ppbv and 4 ppbv). Subplots (a), (c), (e) and (g) show the ODE hours screened by the TM1-5 ppbv method for the whole spring, March, April and May, respectively, and subplots (b), (d), (f) and (h) show the hours screened by the TM1-4 ppbv method. Red dashed lines represent linear regressions of the ODE hours. The regression equations and p-values are also given.

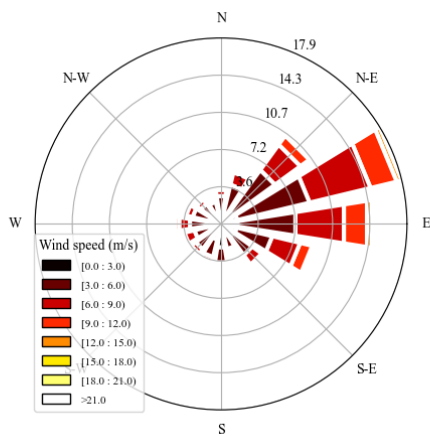

(a) Spring

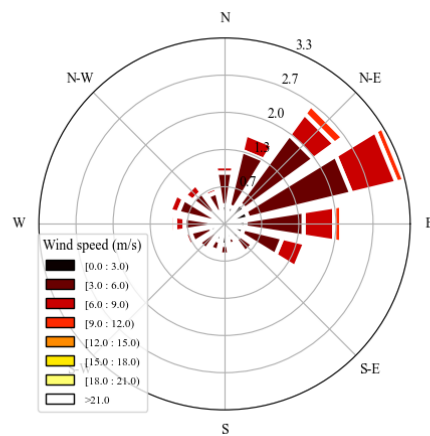

(b) ODE hours (TM1)

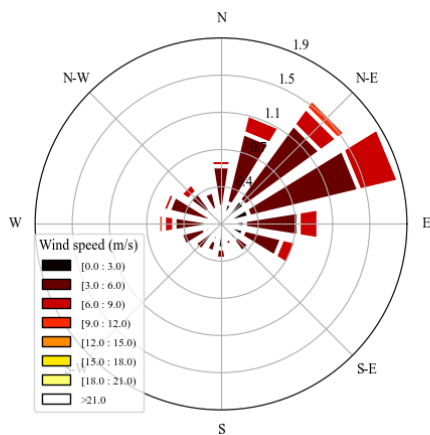

(c) ODE hours (TM1-5 ppbv)

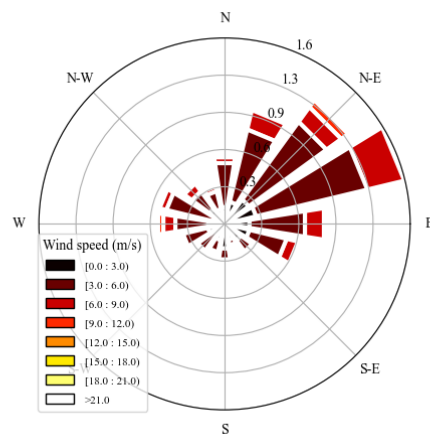

(d) ODE hours (TM1-4 ppbv)

**Figure S4.** Wind rose diagrams during (a) the investigated spring seasons from 2000 to 2022, and ODE time periods identified by (b) TM1, (c) TM1-5 ppbv and (d) TM1-4 ppbv.
